# Supplementary material
Source: PubMed Central journal article supplement (PMC4455887)
Supplement: NIHMS515877-supplement-supplemental_information.pdf [file NIHMS515877-supplement-supplemental_information.pdf]

## Supporting Information

Detection, characterization, and decay kinetics of ROS and thiyl adducts of  
Mito-DEPMPO spin trap.

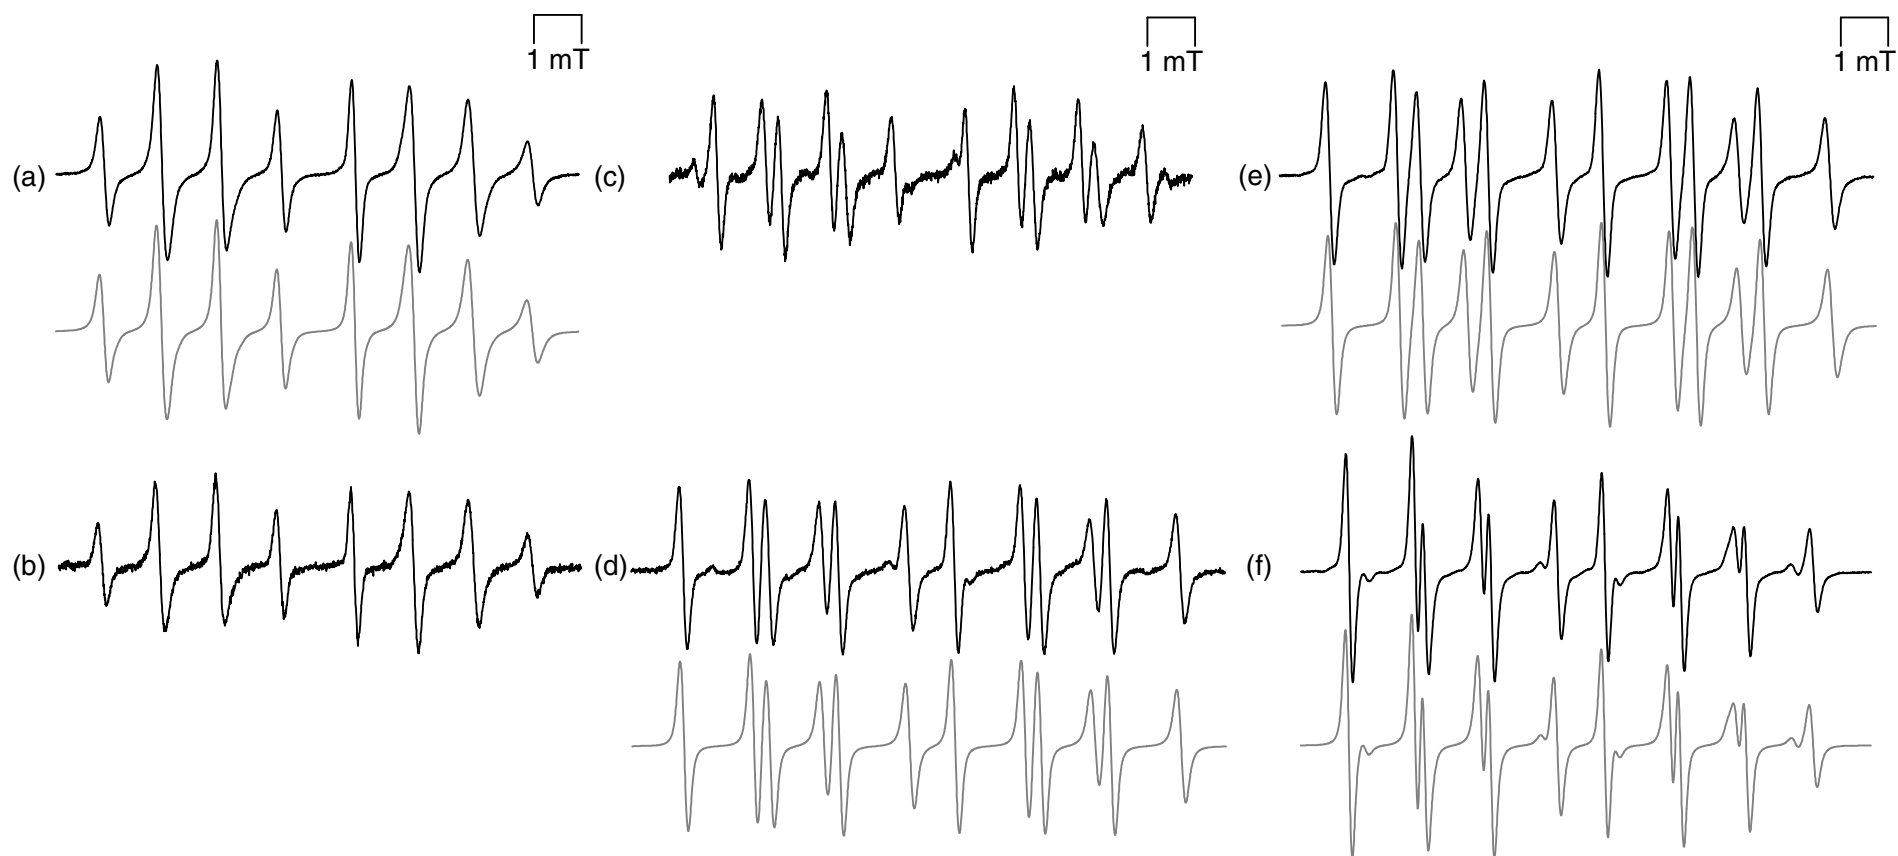

**Figure 1S. Spin trapping of ROS with Mito-DEPMPO.** (a) EPR spectrum obtained after 2 min incubation of a mixture containing  $\text{KO}_2/18\text{-crown-6}$  system (10 mM) and Mito-DEPMPO (20 mM) in a phosphate buffer (0.1 M, pH 7.3); (b) Neuronal nitric oxide synthase (nNOS) (1.4  $\mu\text{g}$ ) was incubated with calcium (0.2 mM), calmodulin (20  $\mu\text{g/mL}$ ), Mito-DEPMPO (20 mM), and NADPH (0.1 mM) in a HEPES buffer (50 mM, pH 7.4) containing 0.1 mM DTPA after 1 min; (c) EPR spectrum obtained after 1 min incubation of a mixture containing Mito-DEPMPO (20 mM),  $\text{H}_2\text{O}_2$  (2 mM),  $\text{FeSO}_4$  (2 mM), DTPA (1 mM) in a phosphate buffer (0.1 M, pH 7.3); (d) as in (c) but in the presence of 10% of DMSO after 30 min and bubbling with Argon gas (1 min); (e) as in (c) but in the presence of 7% of MeOH after 30 min and (f) as in (c) but in the presence of 7% of HCOOH. Spectrometer settings: microwave power 10 mW (a-f); modulation amplitude, 0.5 G (a, d-f), 0.63 (b), 0.8 (c); time constant, 0.640 ms (a, c, e-f), 1.28 ms (b, d); gain  $10^5$  (a-f); sweep time, 335.54 s (a, c-f), 0.167 s (b); conversion time, 0.163 s (a, c-f), 0.8192 s (b).

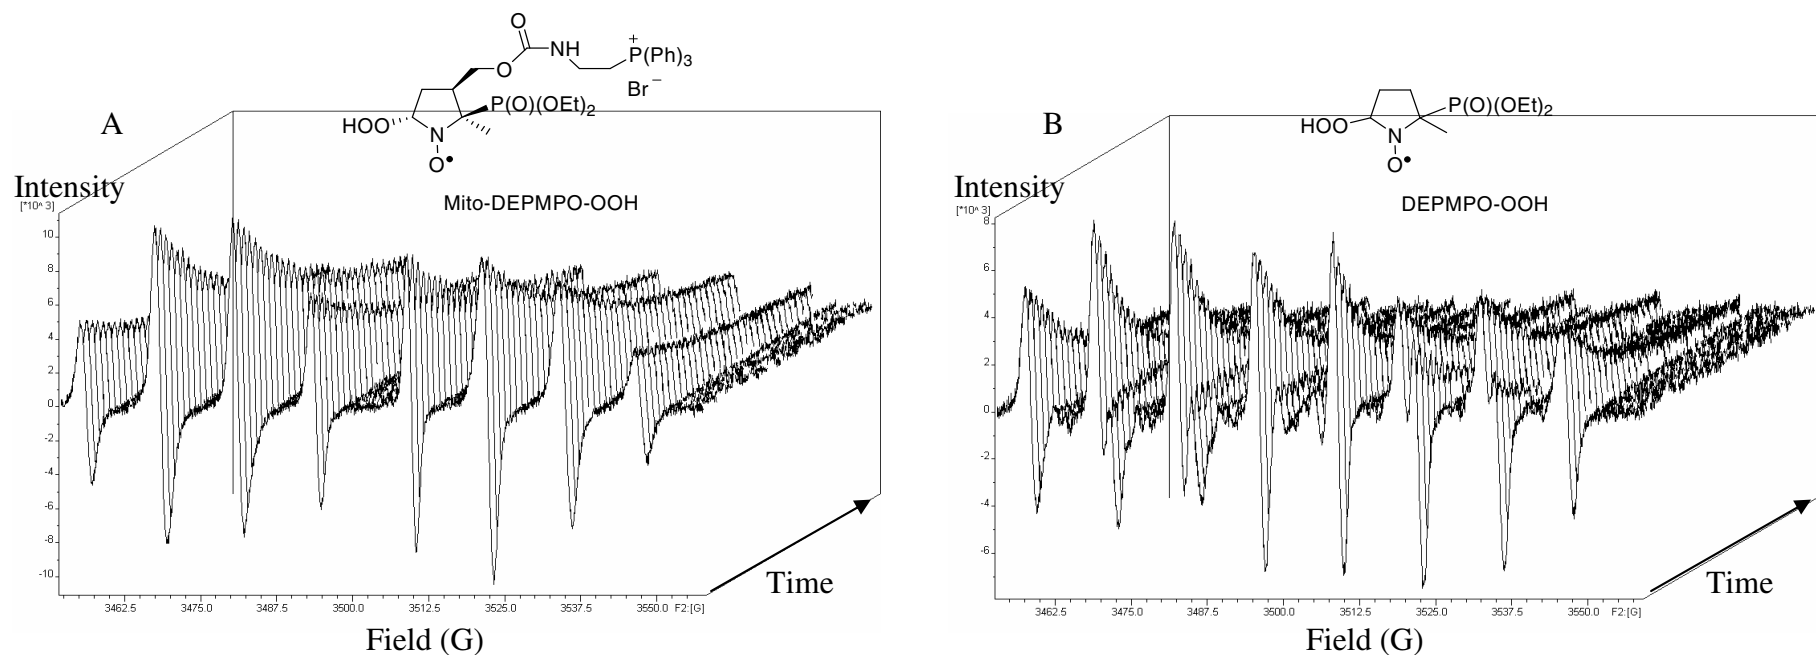

**Figure 2S: Kinetics of the Decay of the Mito-DEPMPO-OOH and the DEPMPO-OOH at room temperature.** (A) EPR spectra obtained after incubation of a mixture containing hypoxanthine (0.4 mM), xanthine oxidase (0.04 U mL $^{-1}$ ), DTPA (1 mM) and Mito-DEPMPO (20 mM) in a phosphate buffer (0.1 M, pH 7.3) at room temperature; (B) As in (A) but in the presence of DEPMPO. The production of superoxide radicals is terminated by addition of a large amount of SOD (1200 U mL $^{-1}$ ). Spectrometer settings: microwave power 10 mW; modulation amplitude, 0.63 G; time constant, 0.128 s; gain  $10^5$ ; sweep time, 0.163 s; conversion time, 0.8192 s.

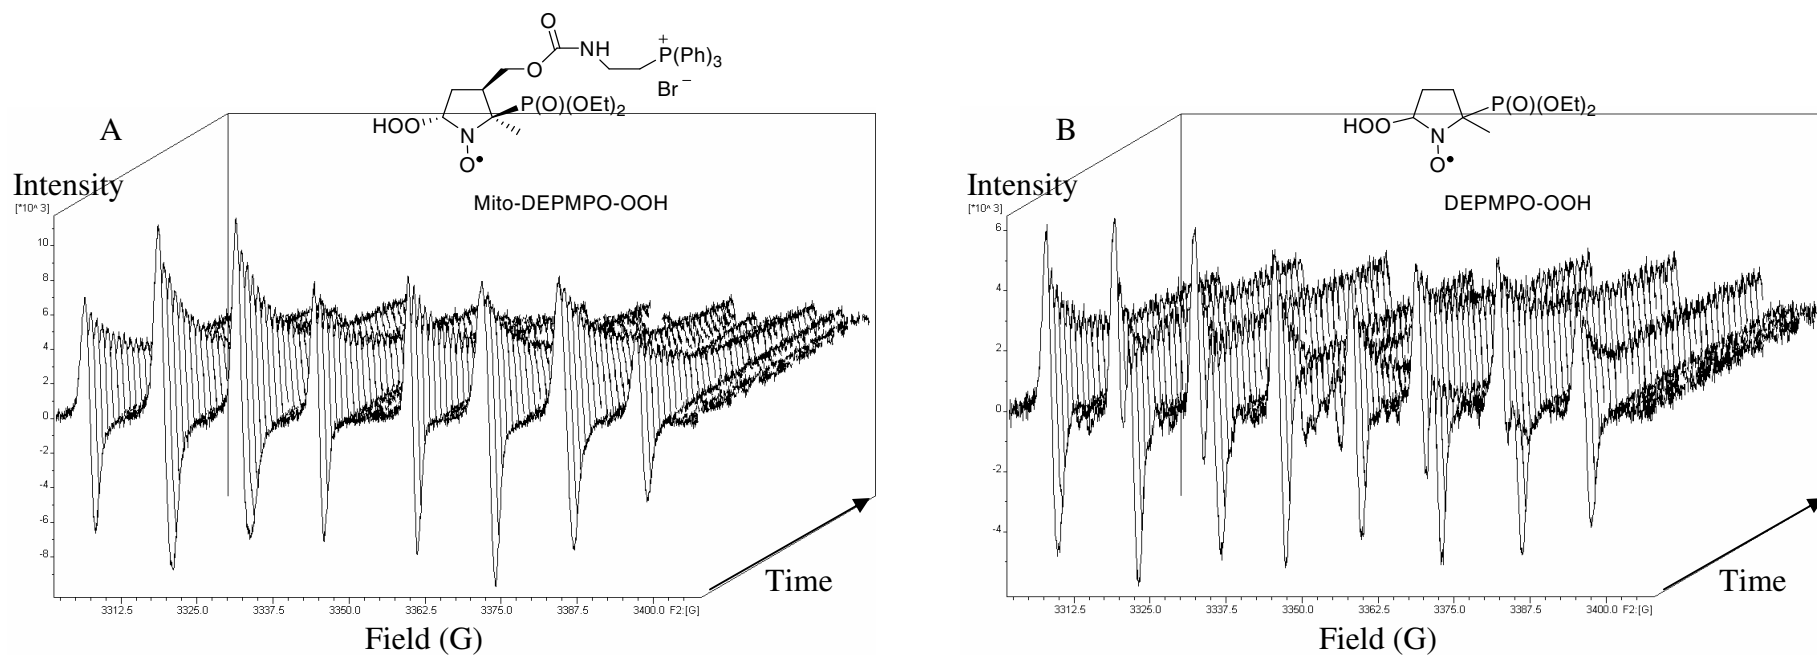

**Figure 3S: Kinetics of the decay of the Mito-DEPMPO-OOH and the DEPMPPO-OOH at 37°C.** (A) EPR spectra obtained after incubation of a mixture containing hypoxanthine (0.4 mM), xanthine oxidase (0.04 U mL<sup>-1</sup>), DTPA (1 mM) and Mito-DEPMPO (20 mM) in a phosphate buffer (0.1 M, pH 7.3) at 37°C; (B) As in (A) but in the presence of or DEPMPPO. The production of superoxide radicals is terminated by addition of a large amount of SOD (1200 U mL<sup>-1</sup>). Spectrometer settings: microwave power 10 mW; modulation amplitude, 0.63 G; time constant, 0.128 s; gain 10<sup>5</sup>; sweep time, 0.163 s; conversion time, 0.8192 s.

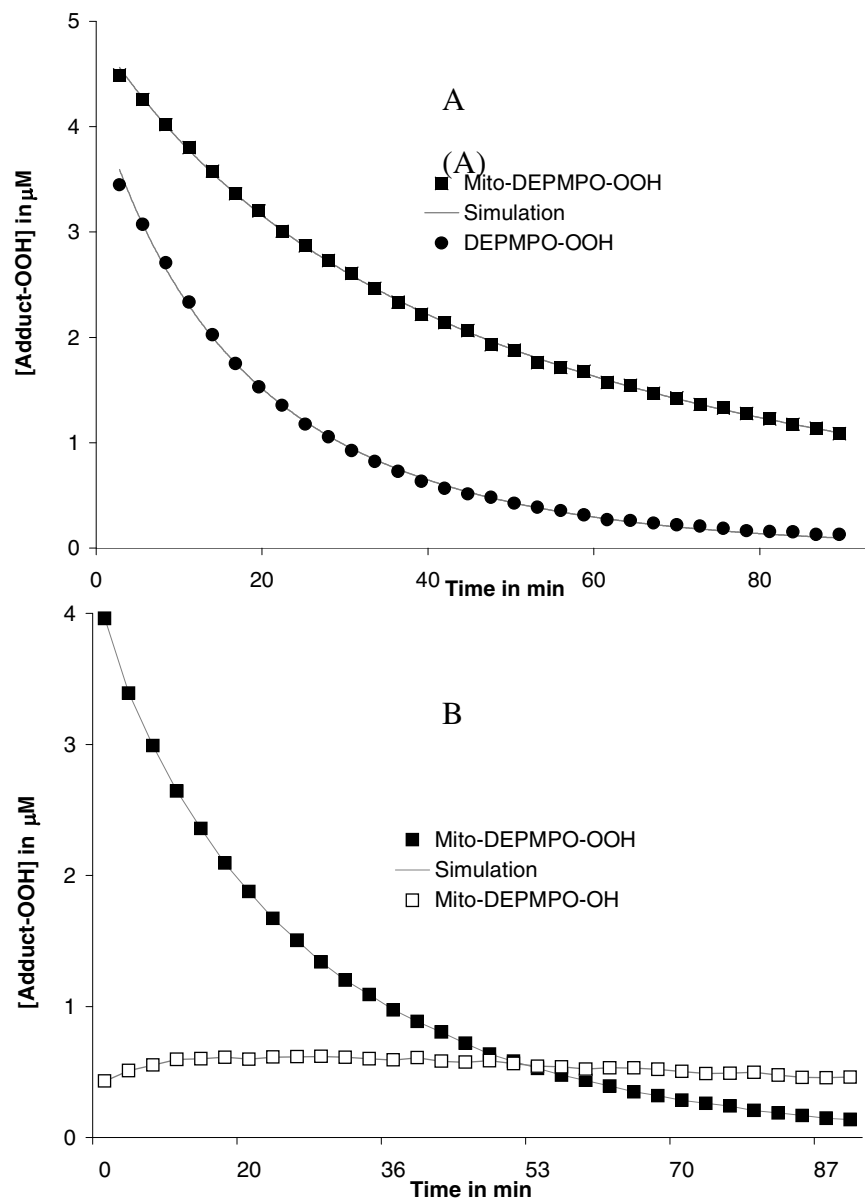

**Figure 4S. Kinetics of the decay of the Mito-DEPMPO-OOH and the DEPMPO-OOH at room temperature and at 37°C.** (A) Decay curves for the Mito-DEPMPO-OOH and DEPMPO-OOH adducts at room temperature; (B) Decay curves for the Mito-DEPMPO-OOH adduct at 37°C and (C) Decay curves for the DEPMPO-OOH adduct at 37°C.

The gray line was computed by a combination of first and second order kinetics.

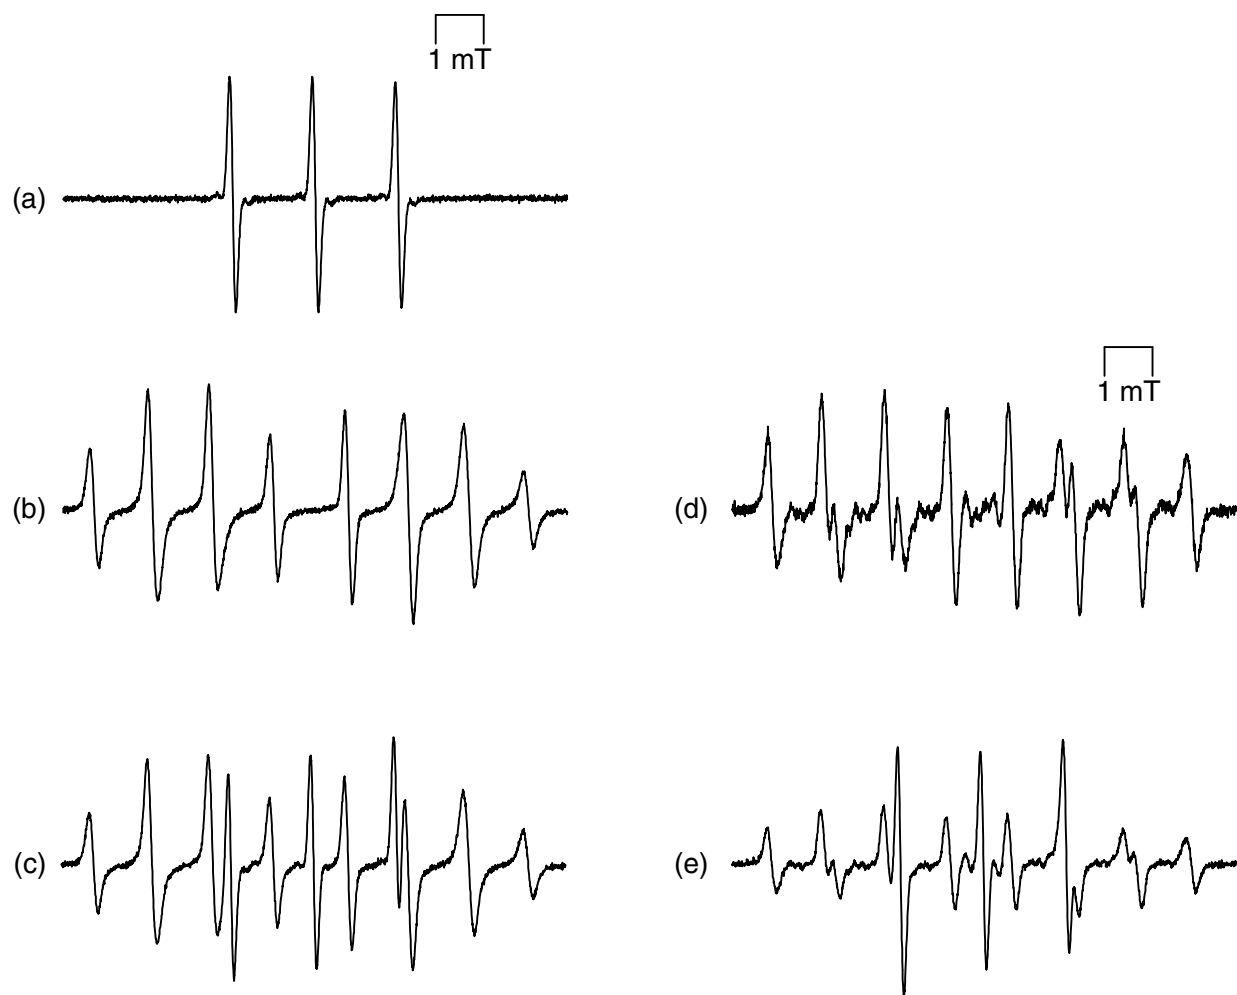

**Figure 5S. Absolute concentration of the superoxide spin adducts DEPMPO and Mito-DEPMPO by TEMPO calibration.** (a) EPR spectrum obtained after incubation of a mixture containing TEMPO (0.01 mM) in a phosphate buffer (0.1M, pH 7.3); (b) EPR spectrum obtained after incubation of a mixture containing HX (0.4 mM), XO (0.04 U mL<sup>-1</sup>), DTPA (1 mM) and Mito-DEPMPO (20 mM) in a phosphate buffer (0.1 M, pH 7.3). The formation of superoxide anion radicals is terminated by addition of a large amount of SOD (1200 U mL<sup>-1</sup>) after 9 min; (c) as in (b) but with TEMPO (0.01 mM); (d) as in (b) but with DEPMPO (20 mM) and (e) as in (d) but with TEMPO (0.01 mM). Spectrometer settings: microwave power 10 mW; modulation amplitude, 0.63 G; time constant, 0.128 s; gain 10<sup>5</sup>; sweep time, 0.163 s; conversion time, 0.8192 s.

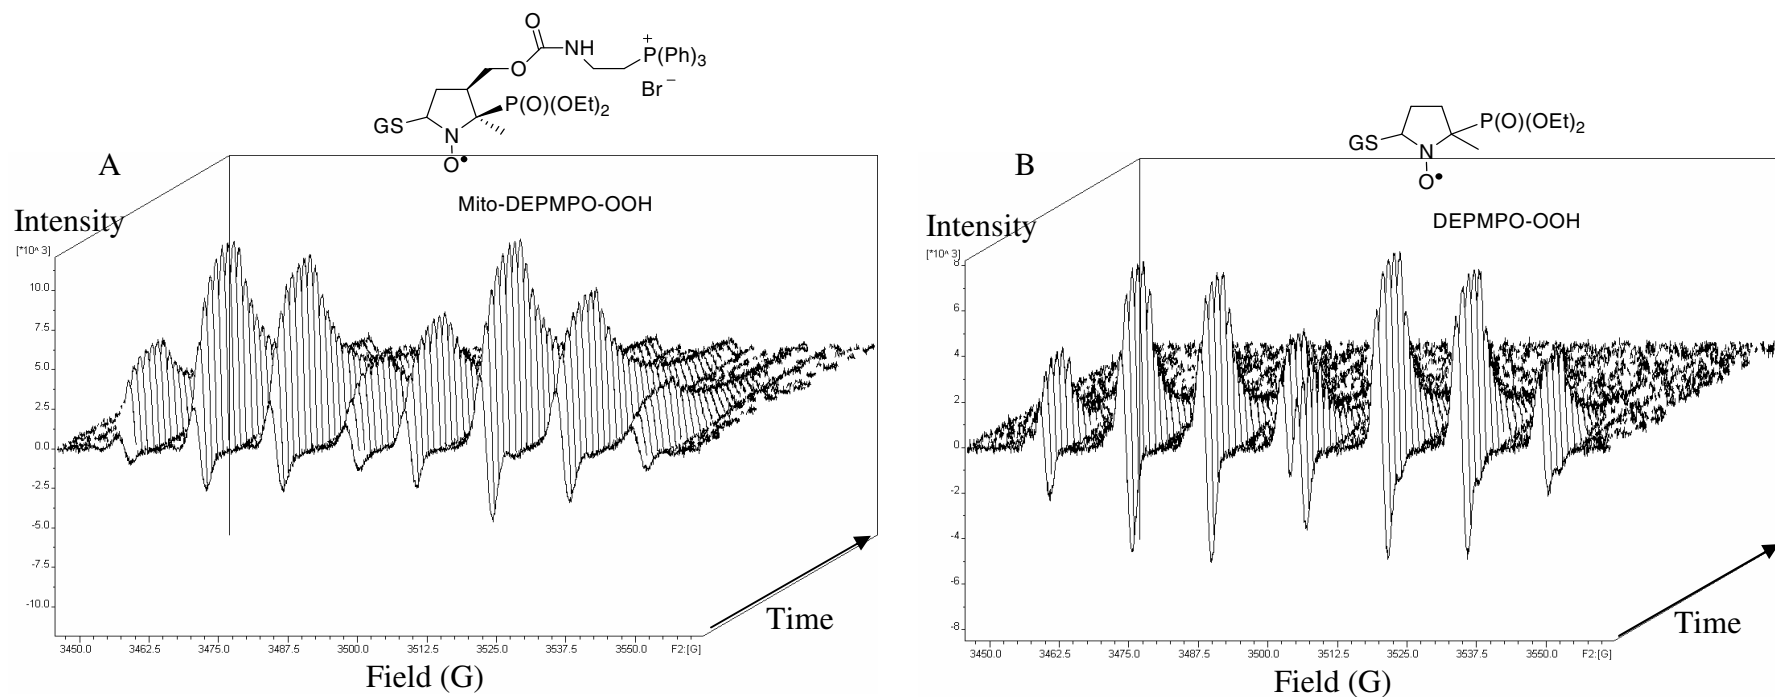

**Figure 6S. Kinetics of the decay of the Mito-DEPMPO-SG and the DEPMPO-SG.** (A) EPR spectra obtained after photolysis (170 W) of a mixture containing GSNO (1 mM), DTPA (1 mM) and Mito-DEPMPO (20 mM) in a phosphate buffer (0.1 M, pH 7.3); (B) As in (A) but in the presence of DEPMPO. The photolysis was terminated once the concentration of the adduct reached a maximal value. Spectrometer settings: microwave power 10 mW; modulation amplitude, 0.63 G; time constant, 0.128 s; gain  $10^5$ ; sweep time, 0.8192 s.

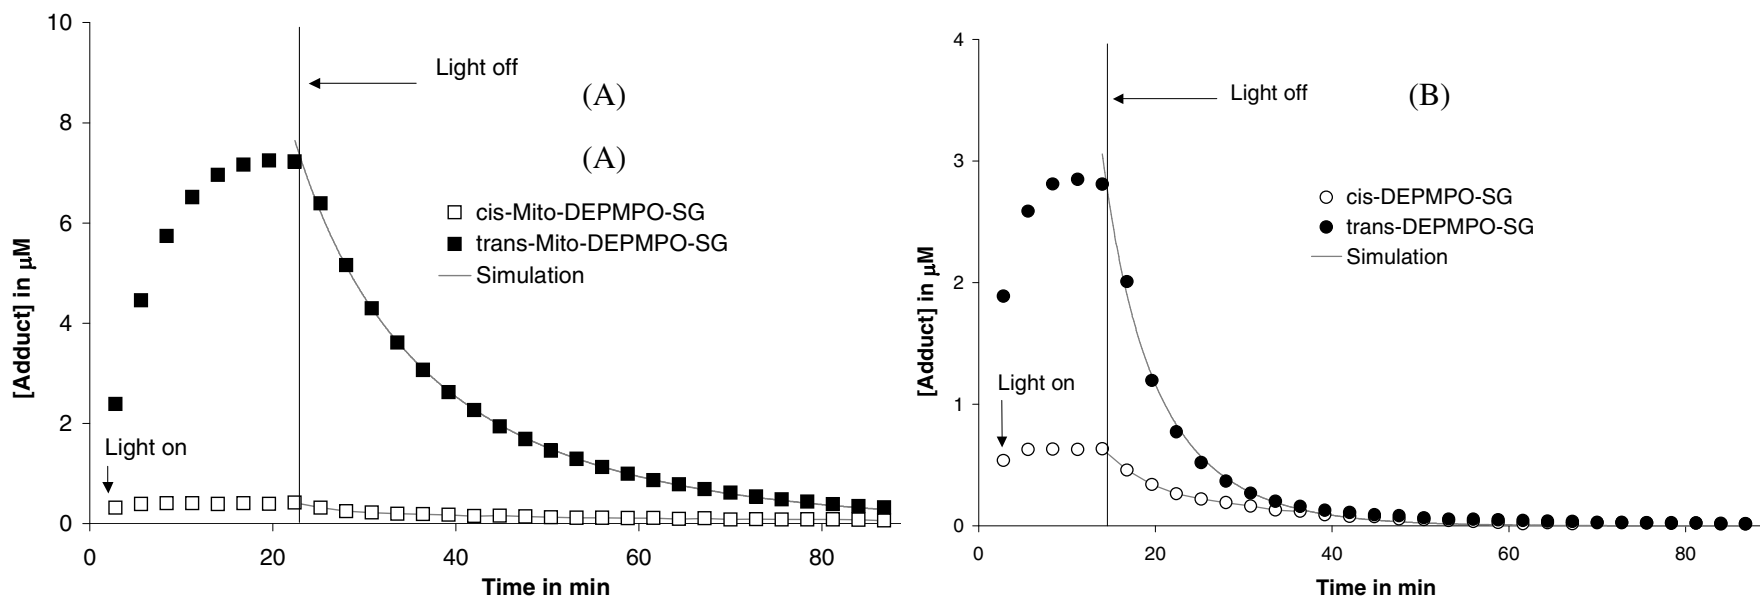

**Figure 7S. Kinetics of the decay of the Mito-DEPMPO-SG and the DEPMPO-SG.** (A) Decay curves for the Mito-DEPMPO-SG adduct at room temperature; (B) Decay curves for the DEPMPO-SG adduct at room temperature. The gray line was computed by a combination of first and second order kinetics:  $-dR/dt = k_1 \times R + k_2 \times R^2$ . The symbols (■ and ●) represent the 32 experimental spectra of Mito-DEPMPO-SG and DEPMPO-SG respectively.



|                                                       | nmoles/mg/min         | Percent control |
|-------------------------------------------------------|-----------------------|-----------------|
| Isolated mitochondria (200 µg)                        | $-7.3 \times 10^{-2}$ | 100%            |
| Isolated mitochondria (200 µg)<br>DEPMPO (50 mM)      | $-5.6 \times 10^{-2}$ | 78%             |
| Isolated mitochondria (200 µg)<br>Mito-DEPMPO (50 mM) | $-5.8 \times 10^{-2}$ | 80%             |

**Table 1S. Mitochondrial Oxygen Consumption measured in the presence of Mito-DEPMPO or DEPMPO.**
